# Supplementary material
Source: MDPI journal article supplement (https://www.mdpi.com/2075-163X/12/2/267)
Supplement: s1 [file s1]

## Supplementary Table S1

Concentrations of major fatty acids (FAs) and hopanoids (hop-17(21)-ene, hop-22(29)-ene,  $\beta\beta$ -bishomohopanoic acid,

| Layer<br>Compound                   | 1               | 2               | 2b              | 3               | 4a              | 4b              | 4               | 5               | 6               |
|-------------------------------------|-----------------|-----------------|-----------------|-----------------|-----------------|-----------------|-----------------|-----------------|-----------------|
| FAs                                 | $\mu\text{g/g}$ |
| 14:0                                | 3.28            | 0.77            | 0.17            | 0.11            | 4.66            | 0.21            | 0.10            | 0.27            | 0.18            |
| <i>i</i> -15:0                      | 4.02            | 2.18            | 0.36            | 0.21            | 9.55            | 0.67            | 0.13            | 0.25            | 0.20            |
| <i>ai</i> -15:0                     | 0.81            | 1.19            | 0.27            | 0.09            | 3.38            | 0.20            | 0.08            | 0.16            | 0.11            |
| 15:0                                | 2.21            | 1.04            | 0.11            | 0.10            | 4.23            | 0.35            | 0.06            | 0.16            | 0.13            |
| <i>i</i> -16:0                      | 7.85            | 1.74            | 0.60            | 0.17            | 12.21           | 0.94            | 0.22            | 0.43            | 0.32            |
| 16:1                                | 26.66           | 0.50            | --              | --              | --              | --              | --              | --              | 0.89            |
| 16:0                                | 35.85           | 7.17            | 1.85            | 0.89            | 54.41           | 1.79            | 0.94            | 2.56            | 1.97            |
| <i>i</i> -17:0                      | 1.18            | 0.59            | 0.18            | 0.08            | 4.69            | 0.34            | 0.10            | 0.18            | 0.16            |
| <i>ai</i> -17:0                     | 1.16            | 0.82            | 0.36            | 0.07            | 5.66            | 0.41            | 0.15            | 0.27            | 0.20            |
| 17:0                                | 2.30            | 1.08            | 0.17            | 0.08            | 4.43            | 0.24            | 0.08            | 0.22            | 0.18            |
| 18:1                                | 50.71           | 5.67            | 0.96            | 0.26            | 5.52            | 0.31            | 0.24            | 0.87            | 0.80            |
| 18:0                                | 12.41           | 3.10            | 1.39            | 0.37            | 47.90           | 0.92            | 0.45            | --              | 1.38            |
| 9,10-cyclopropyl-19:0               | 56.09           | 7.17            | 0.32            | 0.55            | 27.99           | 0.26            | 0.35            | 0.45            | 0.55            |
| 19:0                                | 0.96            | 0.48            | 0.08            | 0.02            | 1.29            | 0.06            | 0.07            | 0.16            | 0.13            |
| 3-hydroxy-methylester (16:0)        | 1.90            | 0.20            | --              | --              | --              | --              | 0.11            | 0.13            | 0.19            |
| 3-hydroxy-methylester (19:0)        | --              | --              | 0.05            | --              | 3.57            | 0.68            | --              | --              | --              |
| 20:0                                | 1.64            | 0.54            | 0.27            | 0.11            | 4.14            | 0.23            | 0.15            | 0.41            | 0.37            |
| 21:0                                | 0.95            | 0.12            | 0.04            | --              | --              | 0.04            | 0.03            | 0.09            | 0.09            |
| 22:0                                | 0.66            | 0.34            | 0.17            | 0.03            | 3.85            | 0.20            | 0.14            | 0.45            | 0.35            |
| 23:0                                | 0.17            | 0.09            | 0.04            | --              | 0.84            | --              | 0.03            | 0.05            | 0.08            |
| 24:0                                | 1.56            | 0.64            | 0.78            | 0.13            | 17.91           | 1.19            | 0.76            | 3.24            | 2.61            |
| 26:0                                | 0.35            | 0.50            | 0.57            | 0.07            | 7.21            | 0.46            | 0.32            | 0.96            | 0.97            |
| 28:0                                | --              | 0.52            | 0.24            | --              | 4.42            | 0.23            | 0.17            | 0.30            | 0.25            |
| 30:0                                | --              | 0.28            | 0.26            | --              | 2.93            | 0.16            | 0.06            | 0.29            | 0.39            |
|                                     |                 |                 |                 |                 |                 |                 |                 |                 |                 |
| Hopanoids                           |                 |                 |                 |                 |                 |                 |                 |                 |                 |
| Hop-17(21)-ene (Moretene)           | 6.67            | 2.82            | 2.25            | 0.38            | 9.16            | 0.50            | 0.48            | 1.84            | 1.05            |
| Hop-22(29)-ene (Diploptene)         | 6.27            | 1.25            | 4.70            | 0.61            | 7.26            | 0.16            | 0.20            | 0.81            | 0.31            |
| Hop-21(22)-ene                      | --              | --              | 0.89            | --              | 0.82            | 0.05            | --              | --              | --              |
| Unknown C <sub>30</sub> Hopene      | --              | --              | 0.63            | --              | 1.44            | 0.03            | --              | --              | --              |
| $\beta\beta$ -homohopanoic acid     | --              | --              | --              | --              | 2.47            | 0.11            | --              | --              | --              |
| $\beta\beta$ -bishomohopanoic acid  | 2.17            | 7.74            | 7.44            | 0.79            | 32.25           | 3.87            | 1.78            | 2.60            | 2.59            |
| $\beta\beta$ -trishomohopanoic acid | --              | --              | n.d.            | --              | 1.03            | 0.12            | --              | --              | --              |
| $\beta\beta$ -bishomohopanol        | 1.56            | 3.24            | 8.15            | 1.26            | 11.23           | 0.31            | 0.88            | 3.32            | 1.06            |
| $\alpha\beta$ -trishomohopanol      | --              | 0.71            | 4.71            | 0.94            | 4.99            | 0.10            | --              | 1.19            | 0.69            |

$\beta\beta$ -bishomohopanol-32-ol and  $\alpha\beta$ -trishomohopanol-32-ol) in freely extractable lipids of the microbial mat layers ( $\mu\text{g/g}$  dry mat).

## Supplementary Table S2

Concentrations of major fatty acids (FAs) and hopanoids (Hop-17(21)-ene, Hop-22(29)-ene,  $\beta\beta$ -bishomohopanoic acid,  $\beta\beta$ -bishomohopanol and  $\alpha\beta$ -trishomohopanol) in carbonate-bound lipids of the microbial mat layers ( $\mu\text{g/g}$  dry mat).

| Layer<br>Compound                  | 1               | 2               | 2b              | 3               | 4a              | 4b              | 4               | 5               | 6               |
|------------------------------------|-----------------|-----------------|-----------------|-----------------|-----------------|-----------------|-----------------|-----------------|-----------------|
| FAs                                | $\mu\text{g/g}$ |
| 14:0                               | 0.37            | 0.25            | 0.11            | 0.65            | 7.84            | 0.02            | 0.19            | 0.18            | 0.12            |
| <i>i</i> -15:0                     | 0.70            | 0.74            | 0.29            | 3.71            | 26.43           | 0.05            | 0.54            | 0.51            | 0.43            |
| <i>ai</i> -15:0                    | 0.21            | 0.23            | 0.11            | 0.46            | 5.71            | 0.03            | 0.12            | 0.13            | 0.11            |
| 15:0                               | 0.28            | 0.42            | 0.11            | 0.92            | 11.26           | 0.01            | 0.27            | 0.26            | 0.26            |
| <i>i</i> -16:0                     | 0.61            | 0.78            | 0.73            | 3.41            | 35.43           | 0.07            | 0.76            | 0.49            | 0.55            |
| 16:1                               | 1.13            | 0.36            | --              | --              | --              | --              | --              | --              | --              |
| 16:0                               | 5.49            | 2.62            | 1.38            | 12.19           | 77.38           | 0.26            | 2.34            | 1.48            | 1.36            |
| <i>i</i> -17:0                     | 0.12            | 0.31            | 0.18            | 1.34            | 11.25           | 0.03            | 0.26            | 0.14            | 0.19            |
| <i>ai</i> -17:0                    | 0.14            | 0.31            | 0.35            | 1.31            | 10.87           | 0.05            | 0.27            | 0.18            | 0.22            |
| 17:0                               | 0.30            | 0.56            | 0.13            | 0.89            | 8.69            | 0.02            | 0.24            | 0.18            | 0.21            |
| 18:1                               | 3.49            | 0.91            | --              | 1.41            | 5.93            | 0.08            | 0.31            | --              | 0.12            |
| 18:0                               | 2.59            | 1.29            | 0.65            | 4.97            | 36.08           | 0.20            | 1.36            | 0.62            | 0.61            |
| 9,10-cyclopropyl-19:0              | 3.17            | 4.92            | 0.91            | 33.82           | 80.77           | 0.06            | 5.61            | 1.28            | 2.96            |
| 19:0                               | 0.05            | 0.17            | 0.05            | 0.25            | 1.49            | 0.02            | 0.11            | 0.09            | 0.04            |
| 3-hydroxy-methylester (12:0)       | --              | 0.10            | --              | 0.23            | --              | --              | 0.28            | 0.05            | 0.04            |
| 3-hydroxy-methylester (14:0)       | --              | 0.05            | 0.10            | 0.42            | 11.30           | --              | 0.26            | 0.06            | 0.10            |
| 3-hydroxy-methylester (16:0)       | --              | 0.25            | 0.12            | 3.99            | 9.13            | --              | 1.45            | 0.11            | 0.27            |
| 3-hydroxy-methylester (17:0)       | --              | --              | 0.06            | --              | 2.68            | --              | --              | --              | --              |
| 3-hydroxy-methylester (19:0)       | --              | --              | --              | --              | 33.18           | --              | --              | --              | --              |
| 20:0                               | 0.08            | 0.18            | 0.18            | 0.62            | 5.19            | 0.03            | 0.31            | 0.06            | 0.08            |
| 21:0                               | 0.50            | 0.15            | 0.04            | 1.83            | 1.19            | 0.01            | 0.35            | 0.20            | 0.06            |
| 22:0                               | 0.10            | 0.17            | 0.11            | 1.04            | 7.73            | 0.02            | 0.59            | 0.11            | 0.07            |
| 24:0                               | 0.21            | 0.45            | 0.37            | 2.41            | 39.57           | 0.10            | 2.79            | 0.60            | 0.67            |
| 26:0                               | 0.09            | 0.15            | 0.19            | 0.65            | 15.80           | 0.06            | 0.85            | 0.14            | 0.17            |
| 28:0                               | --              | 0.12            | 0.11            | 0.49            | 5.06            | 0.04            | 0.47            | --              | --              |
| 30:0                               | --              | --              | --              | --              | 3.54            | 0.04            | --              | --              | --              |
| Dioic acids-21:0                   | --              | --              | --              | 0.29            | 1.36            | --              | 0.18            | --              | --              |
| Dioic acids-22:0                   | --              | --              | 0.04            | 0.38            | 2.42            | --              | 0.17            | --              | --              |
| Dioic acids-23:0                   | --              | --              | 0.06            | 0.79            | 3.72            | --              | 0.21            | --              | --              |
| Dioic acids-24:0                   | --              | --              | --              | 0.27            | 1.44            | --              | 0.18            | --              | --              |
| Dioic acids-25:0                   | --              | --              | 0.06            | 0.29            | 1.62            | --              | 0.11            | --              | --              |
| Dioic acids-26:0                   | --              | --              | 0.06            | 0.38            | 2.81            | --              | 0.15            | --              | --              |
| Dioic acids-27:0                   | --              | --              | 0.07            | 0.30            | 2.28            | --              | 0.23            | --              | --              |
| Dioic acids-28:0                   | --              | --              | 0.14            | 0.74            | 4.12            | --              | 0.26            | --              | --              |
|                                    |                 |                 |                 |                 |                 |                 |                 |                 | --              |
| Hopanoids                          |                 |                 |                 |                 |                 |                 |                 |                 | --              |
| Hop-17(21)-ene (Moretene)          | --              | --              | 0.36            | 1.03            | 0.16            | 0.34            | 0.15            | --              | --              |
| Hop-22(29)-ene (Diploptene)        | --              | --              | 1.93            | --              | 0.73            | --              | --              | --              | --              |
| Hop-21(22)-ene                     | --              | --              | 0.85            | --              | --              | --              | --              | --              | --              |
| $\beta\beta$ -homohopanoic acid    | --              | --              | 0.37            | --              | 1.47            | --              | --              | --              | --              |
| $\beta\beta$ -bishomohopanoic acid | --              | 0.72            | 3.39            | 2.19            | 14.00           | 1.08            | 1.76            | 0.22            | 0.22            |
| $\beta\beta$ -bishomohopanol       | --              | 0.22            | 5.65            | --              | 3.24            | 0.14            | 0.33            | --              | 0.50            |
| $\alpha\beta$ -trishomohopanol     | --              | --              | 14.43           | --              | 8.27            | 0.30            | --              | --              | --              |
